# Supplementary material for: Kinematics of mouthbrooding inOreochromis niloticus(Cichlidae)
Source: Oxford University Press journal article supplement (doi:10.1242/jeb.131631), 2016-05-15
Supplement: jeb131631supp.pdf [file jeb131631supp.pdf]

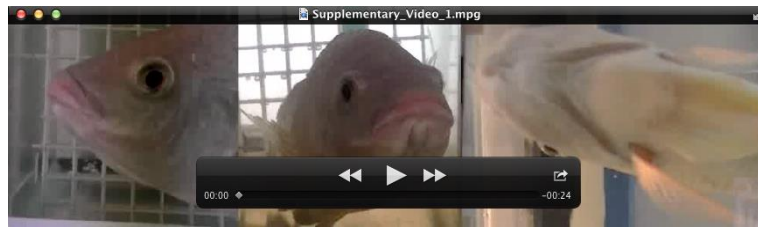

Movie 1. Multi-view video of mouthbrooding behaviour. Synchronised lateral, frontal, and ventral view on a female Nile tilapia during mouthbrooding.

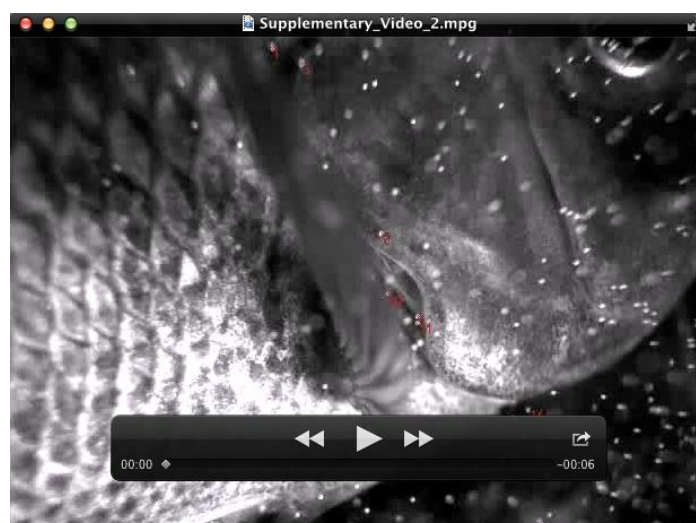

Movie 2. Flow visualisation at the gill slit during churning. Slow-motion video (real time duration = 0.66 s) showing the tracked microspheres flowing in (red numbers) and out (green numbers) of the gill slit during churning by a female Nile tilapia.

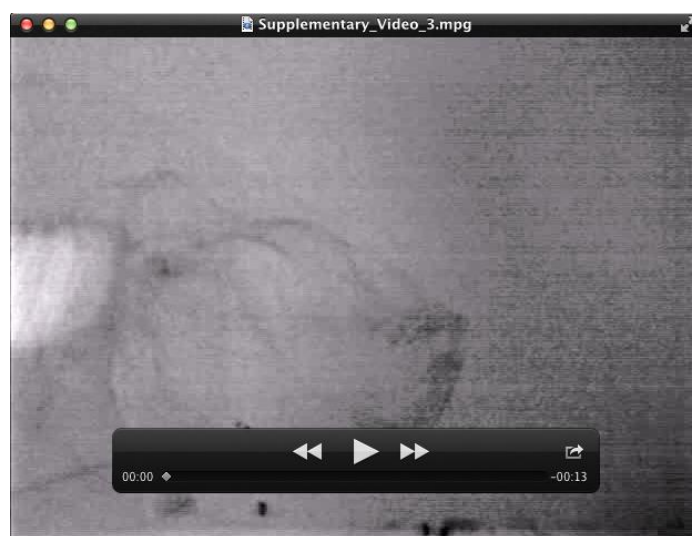

Movie 3. X-ray video showing the motion of a sphere inside the mouth cavity during churning. Slow-motion x-ray video showing the motion of a dummy egg (metal-marked sphere) during two consecutive cycles of churning (corresponding to paths 1 and 2 in Fig. 4).
